# Supplementary material
Source: PubMed Central journal article supplement (PMC3157208)

Supplementary Figure S2

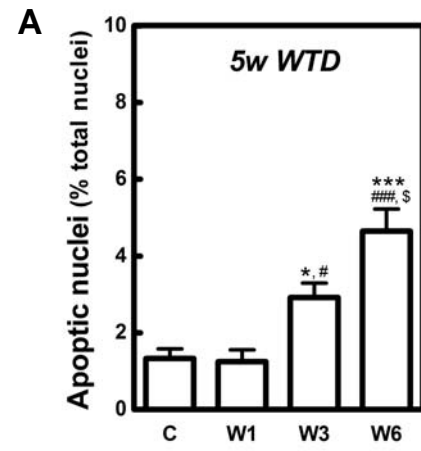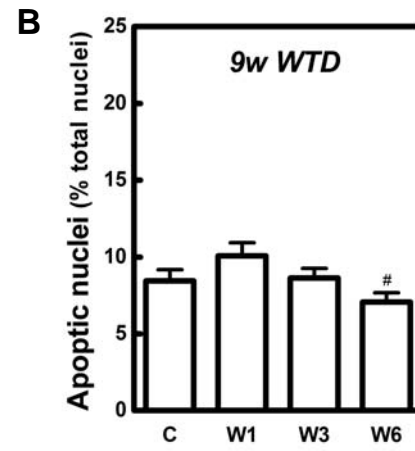

Supplement: mmc2.pdf [file mmc2.pdf]

Supplementary Figure S3

A

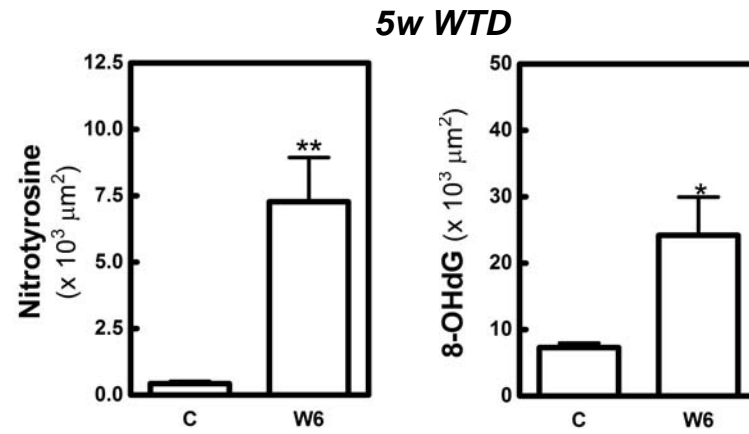

B

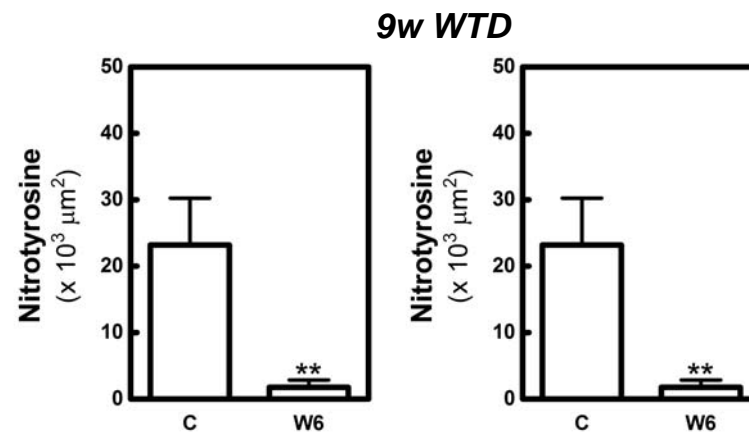

Supplement: mmc3.pdf [file mmc3.pdf]
